# Supplementary material for: TPC1 Has Two Variant Isoforms, and Their Removal Has Different Effects on Endo-Lysosomal Functions Compared to Loss of TPC2
Source: PubMed Central journal article supplement (PMC4386455; doi:10.1128/mcb.00113-14), 2014-11
Supplement: MCB.00113-14_zmb999100621so1.pdf [file MCB.00113-14_zmb999100621so1.pdf]

## TPC1 has two variant isoforms and their removal has different effects on endo-lysosomal functions compared to loss of TPC2

Margarida Ruas, Kai-Ting Chuang, Lianne C Davis, Areej Al-Douri, Patricia W Tynan,  
Ruth Tunn, Lydia Teboul, Antony Galione, John Parrington

**Table S1. Primers and PCR parameters used for determination of the gene trap insertion site in the *Tpcn1*<sup>XG716</sup> allele.**

| Primers                                                | PCR parameters                                       |
|--------------------------------------------------------|------------------------------------------------------|
| F1: GCAGAGCGAGGTATGTAGGC<br>R1: TTGCCGCCTCTTGATAATTC   | 92 °C (2 min)                                        |
| F1: GCAGAGCGAGGTATGTAGGC<br>R2: GGCAGATCTTTGAAGGCAAG   | 92 °C (10 s)<br>56 °C (15 s)<br>68 °C (6 min) } 10 x |
| F1: GCAGAGCGAGGTATGTAGGC<br>R3: ATGATGAGGCTCTTGGGATG   |                                                      |
| F2: TGACGGTGAAAACCTCTGACAC<br>R4: GGCAGATCTTTGAAGGCAAG | 72 °C (6 min)                                        |

F (forward), R (reverse).

**Table S2. Primers and PCR parameters used for genotyping mice.**

| Mouse line                    | Primers                                                                                     | Amplicon sizes (bp)                 | PCR parameters                                       |
|-------------------------------|---------------------------------------------------------------------------------------------|-------------------------------------|------------------------------------------------------|
| <i>Tpcn1</i> <sup>XG716</sup> | I2 F: AACTTGTTAGGATCTCCCCGC<br>I2 R: GGCAGATCTTTGAAGGCAAG<br>βgeo F: TGACGGTGAAAACCTCTGACAC | WT allele: 496<br>XG716 allele: 383 | 94 °C (5 min)                                        |
|                               |                                                                                             |                                     | 94 °C (15 s)<br>56 °C (30 s)<br>72 °C (1 min) } 30 x |
| <i>Tpcn1</i> <sup>T159</sup>  | I4 F: CTGGCATCTTGAGGTTTGGT<br>I5 R: GGGCTACACTCCCAAGCATA<br>βgal F: CCAGCTCATTCTCCCACTC     | WT allele: 376<br>T159 allele: 459  | 72 °C (6 min)                                        |

Primers for genotyping *Tpcn1*<sup>XG716</sup> were designed based on results from Figure 1C.  
Primers for genotyping *Tpcn1*<sup>T159</sup> were designed based on information available at EMMA.  
I (intron), E (exon), βgeo (βgal/neo cassette).

**Table S3. Primers and PCR annealing temperatures used for studying expression of transcripts.**

| Transcript         | Primers                                                               | Amplicon sizes (bp) | Anneling temperature |
|--------------------|-----------------------------------------------------------------------|---------------------|----------------------|
| <i>Tpcn1A</i>      | E2 F: AGTTTAGATGACGATGTGCCG<br>E9 R: TTGACGATGCTGTTCTCCAG             | 819                 | 58                   |
| <i>Tpcn1B</i>      | I2 F: CCACCACGGCTTCTGAGTT<br>E6 R: CACAATGGCCTCGATGAAC                | 497                 | 57                   |
| <i>Tpcn1B</i>      | I2 F: CCACCACGGCTTCTGAGTT<br>E27 R: AGAAGAGGCTGGCTTGACG               | 2408                | 58                   |
| <i>Tpcn1A/B</i>    | E4 F: ACCTCTTCGTCCACAACCAC<br>E9 R: TTGACGATGCTGTTCTCCAG              | 516                 | 58                   |
| <i>Tpcn1A/B</i>    | E6 F: ATTTTCCTGGTGGACTGTGCG<br>E13 R: CAGAGCAGCGACTTCGTAAA            | 606                 | 57                   |
| <i>Tpcn1A:βgeo</i> | E2 F: AGTTTAGATGACGATGTGCCG<br>βgeo R: GACAGTATCGGCTCAGGAAGATCG       | 438<br>(in XG716)   | 58                   |
|                    |                                                                       | 1335<br>(in T159)   | 58                   |
| <i>Actb</i>        | E2 F: GATGACGATATCGCTGCGCTGGTTCG<br>E4 R: GCCTGTGGTACGACCAGAGGCATACAG | 447                 | 58                   |

I (intron), E (exon), βgeo (βgal/neo cassette).

**Table S4. Primers and probes used for qPCR**

| Transcript      | Primers                                              | Universal Probe |
|-----------------|------------------------------------------------------|-----------------|
| <i>Tpcn1A/B</i> | F: TCCAAGGCCTTCCAGTATTTTC<br>R: CTCCACCAGGATCCAGACAC | 77              |
| <i>Gapdh</i>    | F: AGCTTGTCATCAACGGGAAG<br>R: TTTGATGTTAGTGGGGTCTCG  | 9               |
| <i>Cyc1</i>     | F: ACCTGGTGGGAGTGTGCTAC<br>R: CATCATCATTAGGGCCATCC   | 10              |
| <i>Actb</i>     | F: CTAAGGCCAACCGTGAAAAG<br>R: ACCAGAGGCATACAGGGACA   | 64              |
| <i>Rn18s</i>    | F: CTCAACACGGGAAACCTCAC<br>R: CGCTCCACCAACTAAGAACG   | 77              |
| <i>Rhob</i>     | F: TATGTGGCGGACATCGAG<br>R: AGAGCGGCCGTAAACGAT       | 79              |
| <i>Rab7b</i>    | F: TCGAGGAATACCAGACCACA<br>R: GCTTCAAAGTTGTGTCATCCAA | 55              |

Primer pairs and their matching Universal ProbeLibrary probes were designed by Roche Universal ProbeLibrary Assay Design Centre.
